# Supplementary material for: Fire forbids fifty-fifty forest
Source: PubMed Central journal article supplement (PMC5774724; doi:10.1371/journal.pone.0191027), 2018-01-19
Supplement: pone.0191027.s002.pdf [file pone.0191027.s002.pdf]

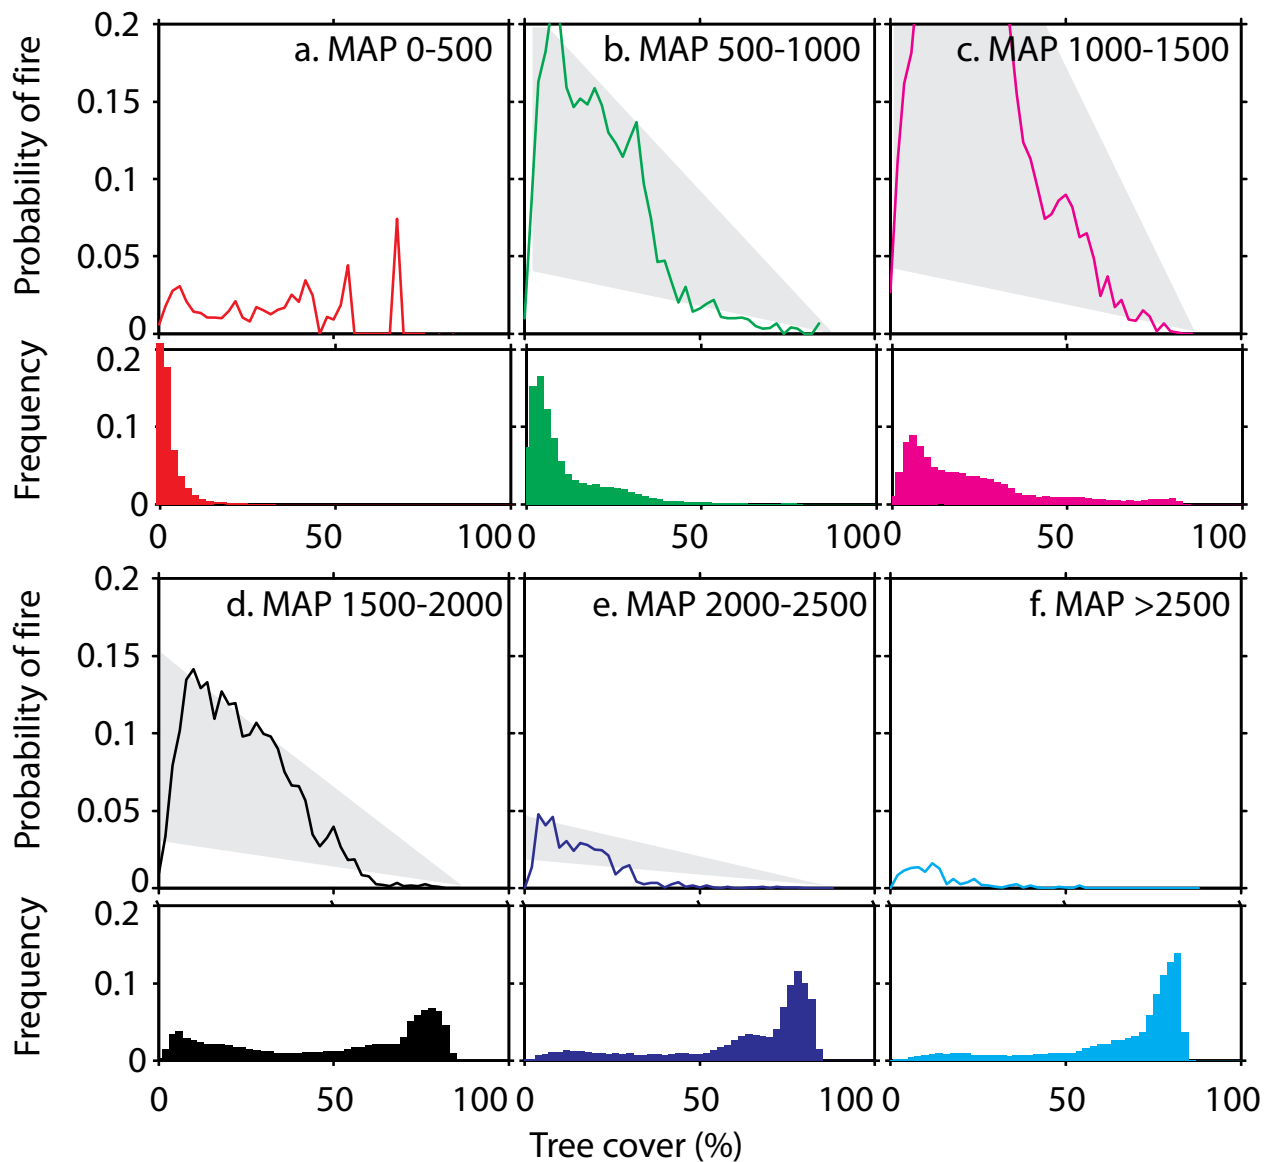

**S2 Fig. Multimodality in tree cover and the shape of the fire function match within different classes of mean annual precipitation (MAP in  $\text{mm yr}^{-1}$ ) for all tropics.** The grayed areas approximate the range of logistic growth functions where alternative stable states are possible. a:  $\text{MAP} < 500 \text{ mm yr}^{-1}$ ; b: MAP between 500 and  $1000 \text{ mm yr}^{-1}$ ; c: MAP between 1000 and  $1500 \text{ mm yr}^{-1}$ , the maximum probability of fire here is  $0.27 \text{ yr}^{-1}$ ; d: MAP between 1500 and  $2000 \text{ mm yr}^{-1}$ ; e: MAP between 2000 and  $2500 \text{ mm yr}^{-1}$ ; f:  $\text{MAP} > 2500 \text{ mm yr}^{-1}$
