# Supplementary material for: Fire forbids fifty-fifty forest
Source: PubMed Central journal article supplement (PMC5774724; doi:10.1371/journal.pone.0191027), 2018-01-19
Supplement: pone.0191027.s004.pdf [file pone.0191027.s004.pdf]

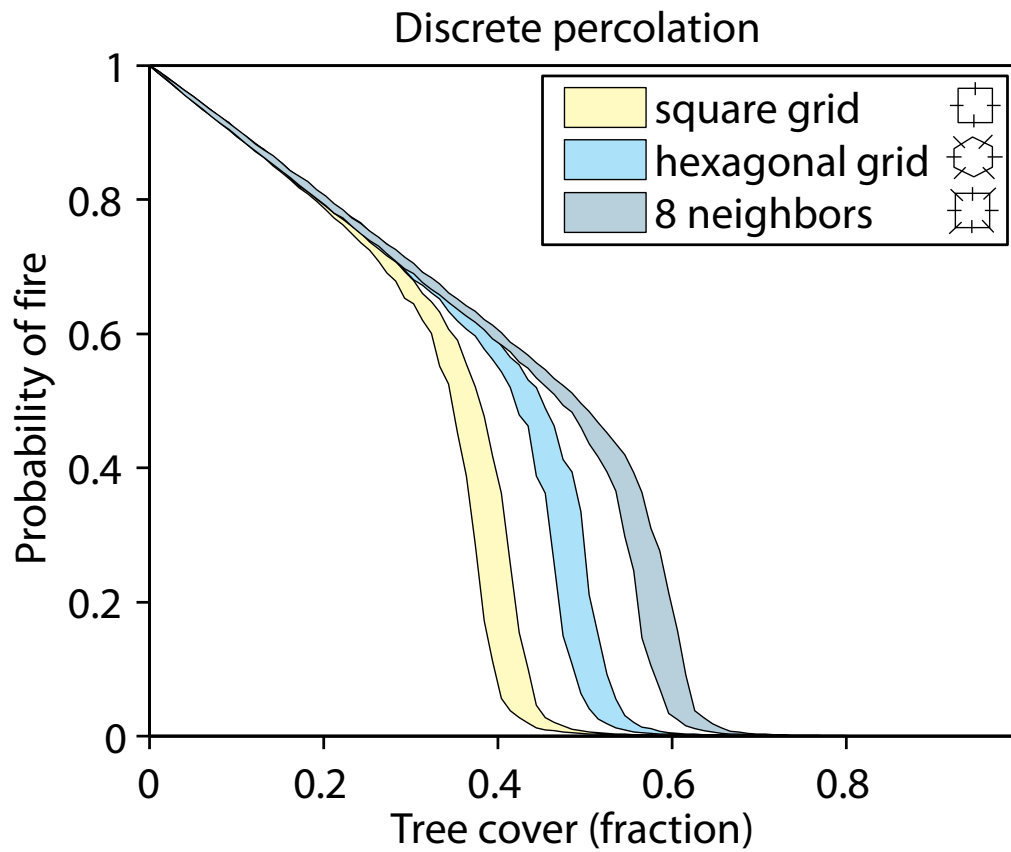

**S4 Fig. The probability of fire in a percolation model if a discrete lattice is assumed.** The drop due to the percolation point is dependent on the assumptions about the connectivity between the cells. Yellow: “square grid”: fire can spread in 4 directions in the lattice, cyan: “hexagonal grid” fire can spread in 6 directions in the lattice; blue “8-neighbors” like the square grid but fire can also spread in 4 diagonal directions.
