# Supplementary material for: Fire forbids fifty-fifty forest
Source: PubMed Central journal article supplement (PMC5774724; doi:10.1371/journal.pone.0191027), 2018-01-19
Supplement: pone.0191027.s006.pdf [file pone.0191027.s006.pdf]

**S1 Table. The best fitting models predicting the probability of fire (500x500 m) for different variables based on the AIC.** Only the six best models based on AIC are shown. **Variables:**

MAP=Mean Annual Precipitation (mm yr<sup>-1</sup>); tree cover=tree cover (%); PWQ=Precipitation of Wettest Quarter (mm yr<sup>-1</sup>); PDQ=Precipitation of Driest Quarter (mm yr<sup>-1</sup>), std. precip. =standard deviation of annual precipitation (mm yr<sup>-1</sup>), cv precip. =coefficient of variation of annual precipitation (mm yr<sup>-1</sup>), MSI=Markham's seasonality index (-), TLU=Livestock density in number of livestock units (km<sup>-2</sup>). **Area:** all = all tropic, SA = South America, AF = Africa and AU+AS = Australia and Asia.

**Formula:** double Hill:  $P_{\text{fire}}(T) = p_1 \frac{T^{p_3}}{T^{p_3} + p_2 p_3} \frac{p_4 p_5}{T^{p_5} + p_4 p_5}$ , Hill function:  $P_{\text{fire}}(T) = p_1 \frac{T^{p_3}}{T^{p_3} + p_2 p_3}$ , inverse Hill function:  $P_{\text{fire}}(T) = p_1 \frac{p_2 p_3}{T^{p_3} + p_2 p_3}$ , logistic:  $P_{\text{fire}}(T) = \frac{1}{1 + \exp(-(p_2 T + p_1))}$ , logistic optimum:

$P_{\text{fire}}(T) = \frac{1}{1 + \exp(-(p_1 T^2 + p_2 T + p_3))}$ . Parameters p<sub>1</sub>-p<sub>5</sub> differ for each of these formulas, and are simply meant to describe empirical patterns.

| Variable   | Area  | Formula       | p1    | p2      | p3        | p4       | p5   | AIC   |
|------------|-------|---------------|-------|---------|-----------|----------|------|-------|
| MAP        | all   | logistic opt. | -7.2  | 0.0109  | -4.97E-06 |          |      | 10163 |
| tree cover | all   | double Hill   | 0.175 | 2.74    | 2.42      | 37.2     | 6.55 | 10596 |
| PWQ        | all   | logistic opt. | -7.63 | 0.0208  | -1.78E-05 |          |      | 10862 |
| MSI        | all   | double Hill   | 0.31  | 67.3    | 3.62      | 82.3     | 114  | 11069 |
| PDQ        | all   | inverse Hill  | 0.173 | 19.4    | 1.27      |          |      | 11138 |
| std precip | all   | logistic opt. | -4.53 | 0.0258  | -6.90E-05 |          |      | 12030 |
| tree cover | SA    | double Hill   | 103   | 3.65    | 3.62      | 3.6533.4 | 3.56 | 1007  |
| MAP        | SA    | logistic opt. | -7.57 | 0.00649 | -2.48E-06 |          |      | 1043  |
| std precip | SA    | logistic opt. | -9.14 | 0.0551  | -0.000133 |          |      | 1058  |
| PDQ        | SA    | Hill function | 0.02  | 146     | -4.8      |          |      | 1059  |
| TLU        | SA    | double Hill   | 2210  | 32.9    | 3.46      | 0.756    | 2.86 | 1073  |
| MSI        | SA    | logistic opt. | -14.4 | 0.408   | -0.00383  |          |      | 1077  |
| MAP        | AF    | logistic opt. | -8.04 | 0.0135  | -6.19E-06 |          |      | 6633  |
| tree cover | AF    | double Hill   | 0.282 | 2.66    | 2.39      | 39.7     | 5.57 | 6762  |
| PWQ        | AF    | logistic opt. | -7.81 | 0.0221  | -1.82E-05 |          |      | 7084  |
| MSI        | AF    | double Hill   | 0.215 | 38.5    | 11.9      | 82.5     | 116  | 7232  |
| cv precip  | AF    | double Hill   | 0.252 | -0.0905 | 0.774     | 0.218    | 5.28 | 7315  |
| std precip | AF    | double Hill   | 3.63  | 127     | 7.31      | 48       | 2.22 | 7618  |
| MSI        | AU+AS | logistic      | -8.8  | 0.0973  |           |          |      | 1676  |
| MAP        | AU+AS | logistic opt. | -6.38 | 0.00861 | -3.73E-06 |          |      | 1755  |
| std precip | AU+AS | logistic opt. | -12.1 | 0.0793  | -1.51E-04 |          |      | 1772  |
| PDQ        | AU+AS | Hill function | 0.193 | -10.4   | -1.64     |          |      | 1786  |
| PWQ        | AU+AS | double Hill   | 0.421 | 715     | 2.13      | 785      | 7.63 | 1845  |
| tree cover | AU+AS | double Hill   | 0.117 | 2.66    | 2.48E+00  | 24.1     | 4.18 | 1899  |
