# Supplementary material for: Fire forbids fifty-fifty forest
Source: PubMed Central journal article supplement (PMC5774724; doi:10.1371/journal.pone.0191027), 2018-01-19
Supplement: pone.0191027.s007.pdf [file pone.0191027.s007.pdf]

**S2 Table. The ranges of tree cover above which the fire frequency drops (see also Fig. 3).** The range of the steepest drop is defined as the area where the fire frequency is between 25% and 75% of the maximum.

| Continent          | Tree cover where the fire frequency drops |
|--------------------|-------------------------------------------|
| All continents     | 31% to 45%                                |
| South America      | 24% to 45%                                |
| Africa             | 33% to 49%                                |
| Australia and Asia | 19% to 32%                                |
