# Supplementary material for: Fire forbids fifty-fifty forest
Source: PubMed Central journal article supplement (PMC5774724; doi:10.1371/journal.pone.0191027), 2018-01-19
Supplement: pone.0191027.s008.pdf [file pone.0191027.s008.pdf]

**S3 Table. Data sources used in this research.** The data analyzed in this paper were downloaded from the following publicly available websites.

| Name of data base              | URL                                                                                                                                                 | citation |
|--------------------------------|-----------------------------------------------------------------------------------------------------------------------------------------------------|----------|
| MODIS tree cover product       | <a href="http://glcf.umd.edu/research/portal/nasaaccess2011/vcf_index.shtml">http://glcf.umd.edu/research/portal/nasaaccess2011/vcf_index.shtml</a> | [1]      |
| MODIS burned area product      | <a href="http://modis-fire.umd.edu/pages/BurnedArea.php">http://modis-fire.umd.edu/pages/BurnedArea.php</a>                                         | [2,3]    |
| WorldClim data                 | <a href="http://www.worldclim.org/version1">http://www.worldclim.org/version1</a>                                                                   | [4]      |
| CRU climate data               | <a href="https://crudata.uea.ac.uk/cru/data/hrg/">https://crudata.uea.ac.uk/cru/data/hrg/</a>                                                       | [5]      |
| HYDE human population data     | <a href="http://themasites.pbl.nl/tridion/en/themasites/hyde/">http://themasites.pbl.nl/tridion/en/themasites/hyde/</a>                             | [6]      |
| Gridded livestock of the world | <a href="http://www.fao.org/ag/againfo/resources/en/glw/home.html">http://www.fao.org/ag/againfo/resources/en/glw/home.html</a>                     | [7]      |

## References

1. DiMiceli CM, Carroll ML, Sohlberg RA, Huang C, Hansen MC, et al. (2011) Annual Global Automated MODIS Vegetation Continuous Fields (MOD44B) at 250 m Spatial Resolution for Data Years Beginning Day 65, 2000 - 2010, Collection 5 Percent Tree Cover. College Park, MD, USA.: University of Maryland.
2. Roy DP, Boschetti L, Justice CO, Ju J (2008) The collection 5 MODIS burned area product - Global evaluation by comparison with the MODIS active fire product. *Remote Sensing of Environment* 112: 3690-3707. doi: 10.1016/j.rse.2008.05.013
3. Giglio L, Randerson JT, Van Der Werf GR (2013) Analysis of daily, monthly, and annual burned area using the fourth-generation global fire emissions database (GFED4). *Journal of Geophysical Research G: Biogeosciences* 118: 317-328. doi: 10.1002/jgrg.20042
4. Hijmans RJ, Cameron SE, Parra JL, Jones PG, Jarvis A (2005) Very high resolution interpolated climate surfaces for global land areas. *International Journal of Climatology* 25: 1965-1978. doi: 10.1002/joc.1276
5. Mitchell TD, Jones PD (2005) An improved method of constructing a database of monthly climate observations and associated high-resolution grids. *International Journal of Climatology* 25: 693-712. doi: 10.1002/Joc.1181

6. Klein Goldewijk K, Beusen A, Van Drecht G, De Vos M (2011) The HYDE 3.1 spatially explicit database of human-induced global land-use change over the past 12,000 years. *Global Ecology and Biogeography* 20: 73-86. doi: 10.1111/j.1466-8238.2010.00587.x
7. Robinson TP, William Wint GR, Conchedda G, Van Boeckel TP, Ercoli V, et al. (2014) Mapping the global distribution of livestock. *PLoS ONE* 9. doi: 10.1371/journal.pone.0096084
